# Supplementary material for: Comparison of personal and shared frameshift neoantigen vaccines in a mouse mammary cancer model
Source: BMC Immunol. 2020 May 5;21:25. doi: 10.1186/s12865-020-00350-3 (PMC7201681; doi:10.1186/s12865-020-00350-3)
Supplement: Supplementary file 1 — Additional file 1: Supplementary Table 1. Personal vaccines peptides selected in murine models. [file 12865_2020_350_MOESM1_ESM.xlsx]

## Sheet: Sheet1
Supplementary Table 1. Personal vaccines peptides selected in murine models.
BC-PCV/ICI vaccs group
Mouse ID	Peptides1	CCDS	INDEL	Gene	Access #	peptide sequence	MS type
1A1	CIMpep48	CCDS10926.1	Ins	ADAMTS18	0	FCNVRQSERWNSLLPKQGSC	TTTTTTTTT
	CIMpep23	CCDS2119.1	Ins	SLC35F5	NM_025181	FWQICHIKKHFQTHKLLGSC	AAAAAAAAAA
	CIMpep22	CCDS2119.1	Del	SLC35F5	NM_025181	GKFVISRSTFRHTSCYSGSC	TTTTTTTTTT
	CIMpep135	CCDS2191.1	Ins	RBM43	NM_198557	KNPEFKLQSFETQWKNLGSC	AAAAAAAAAA
	CIMpep163		Ins			RGRIISGCQEAQRIFASGSC
	CIMpep79	CCDS43071.1	Del	ULK4	XM_929989	KRTLESAGLFPWLHTQCGSC	AAAAAAAAAA
	CIMpep36	CCDS46450.1	Del	DYNC1I2	NM_001378	KRNRPEEGSCCSCARRIGSC	AAAAAAAAA
	CIMpep155		Del			QILKKKGEKLKHCFKAWGSC
	CIMpep127	CCDS46450.1	Ins	DYNC1I2	NM_001378	KKKQTRRRKLLLLCKKNGSC	AAAAAAAAA
	AS-64	N/A	N/A	FANCI-1	N/A	VSPGVSELRRNSKKYGKGSC
	AS-71	N/A	N/A	AURKB-2	N/A	VLPWEEGDSQRHKARKSGSC
	AS-72	N/A	N/A	AURKB-3	N/A	HKARKSALRAQGRAEDCGSC
	AS-96	N/A	N/A	6--21	N/A	MCQMYQPWMCKKYYRLLGSC
	MS-38	MARS_9t_de-1	N/A	MARS	N/A	CYLAGSKMTSLTSGWNGGSC
	MS-39	MARS_9t_de-2	N/A	MARS	N/A	KMTSLTSGWNGKRQSCSGSC
1A2	CIMpep194	CCDS10383.1	Ins	ADAMTS17	NM_139057	PWAWRHTLPGCQCRTCGGSC	CCCCCCCCC
	CIMpep295		Ins			LREPALPQGSAQLPGPAGSC
	CIMpep196	CCDS10665.1	Ins	INO80E	NM_173618	KIPESEAEAQVPHLRARGSC	AAAAAAAAA
	CIMpep297					VLPGGAEESAKEITEGVGS
	CIMpep134	CCDS1690.1	Ins	SMC6	NM_024624	NILVKRESKGLSKSRKFGSC	AAAAAAAAA
	CIMpep162		Ins			RTVSASHRKGQRRTWQNGSC
	CIMpep74	CCDS3630.1	Ins	HERC5	NM_016323	NNSDHMWRLPFSCTLKRGSC	AAAAAAAAA
	CIMpep79	CCDS43071.1	Del	ULK4	XM_929989	KRTLESAGLFPWLHTQCGSC	AAAAAAAAAA
	CIMpep84	CCDS44719.1	Del	CASP5	NM_004347	KKQLRCWNTWAKMFFMVGSC
	CIMpep85	CCDS44720.1	Del	CASP5	NM_004347	KKGVRILKLCSKVSFRVGSC
	CIMpep36	CCDS46450.1	Del	DYNC1I2	NM_001378	KRNRPEEGSCCSCARRIGSC	AAAAAAAAA
	CIMpep155		Del			QILKKKGEKLKHCFKAWGSC
	CIMpep395	CCDS7472.1	Del	SFRP5	NM_003015	TCRSATRWATSACGCPTGSC	GGGGGGGGG
	CIMpep156		Del			AGALRGVRLLWLAGRAAGSC
	CIMpep294		Del			CTAAPTPSRRSALTSLPGSC
	AS-96	N/A	N/A	6--21		MCQMYQPWMCKKYYRLLGSC
	MS-28	Caspase-5-1	N/A	Caspase-5		HKKKQLRCWNTWAKMFFGSC
1A3	CIMpep134	CCDS1690.1	Ins	SMC6	NM_024624	NILVKRESKGLSKSRKFGSC	AAAAAAAAA
	CIMpep162		Ins			RTVSASHRKGQRRTWQNGSC
	CIMpep74	CCDS3630.1	Ins	HERC5	NM_016323	NNSDHMWRLPFSCTLKRGSC	AAAAAAAAA
	CIMpep239	CCDS42721.1	Del	EIF5B	NM_015904	KRKDRRAKNRVLMIMIAGSC	AAAAAAAA
	CIMpep340		Del			KNWKIKIQNQKRLQNRKGSC
	CIMpep441		Del			KKLKGKLKNQIRSGMGQGSC
	CIMpep79	CCDS43071.1	Del	ULK4	XM_929989	KRTLESAGLFPWLHTQCGSC	AAAAAAAAAA
	CIMpep485	CCDS46063.1	Ins	WDR87	NM_031951	KRKSCLCGRHLWHCTMFGSC	AAAAAAAA
	CIMpep489		Ins			CGCCSSDIQKTALLGWNGSC
	CIMpep36	CCDS46450.1	Del	DYNC1I2	NM_001378	KRNRPEEGSCCSCARRIGSC	AAAAAAAAA
	CIMpep155		Del			QILKKKGEKLKHCFKAWGSC
	CIMpep127	CCDS46450.1	Ins	DYNC1I2	NM_001378	KKKQTRRRKLLLLCKKNGSC	AAAAAAAAA
	CIMpep372	CCDS6948.1	Del	TTF1	NM_007344	ASRVHTLKDHRWAVRLGGSC	AAAAAAAA
	CIMpep271		Del			KRKSPITRNLRQWPCLRGSC
	CIMpep474		Del			LWKAVQLLKGSRNPTVQGSC
	CIMpep395	CCDS7472.1	Del	SFRP5	NM_003015	TCRSATRWATSACGCPTGSC	GGGGGGGGG
	CIMpep156		Del			AGALRGVRLLWLAGRAAGSC
	CIMpep294		Del			CTAAPTPSRRSALTSLPGSC
	CIMpep128	CCDS7472.1	Ins	SFRP5	NM_003015	GRADGRAGAAAGGAALGGSC	GGGGGGGGG
	CIMpep193					RRRAARSTTTMAGRPSRGSC
	CIMpep147	CCDS8723.1	Ins	FAM60A	NM_021238	KLESCGRCKGWTQSKDYGSC	AAAAAAAAA
	CIMpep176		Ins			IETKESENSIWEQDKKQGSC
	MS-28			Caspase-5		HKKKQLRCWNTWAKMFFGSC
1A4	CIMpep194	CCDS10383.1	Ins	ADAMTS17	NM_139057	PWAWRHTLPGCQCRTCGGSC	CCCCCCCCC
	CIMpep295		Ins			LREPALPQGSAQLPGPAGSC
	CIMpep396		Ins			VPGTRPAEPQEERPADSGSC
	CIMpep412	CCDS1296.2	Del	PRRC2C	NM_015172	RHLIKMKSSLARMKAQLGSC	AAAAAAAA
	CIMpep210		Del			KKRKQMMTTMDLDPVYVGSC
	CIMpep311		Del			HQMLLVGEMVVRLLAHLGSC
	CIMpep134	CCDS1690.1	Ins	SMC6	NM_024624	NILVKRESKGLSKSRKFGSC	AAAAAAAAA
	CIMpep162		Ins		NM_017599	RTVSASHRKGQRRTWQNGSC
	CIMpep66	CCDS33969.1	Del	RBPJ	NM_015874	KKNKWNAMVVLNKSLNRGSC	TTTTTTT
	CIMpep74	CCDS3630.1	Ins	HERC5	NM_016323	NNSDHMWRLPFSCTLKRGSC	AAAAAAAAA
	CIMpep239	CCDS42721.1	Del	EIF5B	NM_015904	KRKDRRAKNRVLMIMIAGSC	AAAAAAAA
	CIMpep340		Del		NM_015164	KNWKIKIQNQKRLQNRKGSC
	CIMpep441		Del		NM_152546	KKLKGKLKNQIRSGMGQGSC
	CIMpep84	CCDS44719.1	Del	CASP5		KKQLRCWNTWAKMFFMVGSC	AAAAAAAAAA
	CIMpep143	CCDS55048.1	Ins	AK9	NM_001145128	KRRRRSKKSHRRGIETRGSC	AAAAAAAAA
	CIMpep172		Ins			RRKSKATGTYESEGKRSGSC
	CIMpep372	CCDS6948.1	Del	TTF1		ASRVHTLKDHRWAVRLGGSC	AAAAAAAA
	CIMpep271		Del		NM_007344	KRKSPITRNLRQWPCLRGSC
	CIMpep474		Del			LWKAVQLLKGSRNPTVQGSC
	CIMpep147	CCDS8723.1	Ins	FAM60A	NM_021238	KLESCGRCKGWTQSKDYGSC	AAAAAAAAA
	CIMpep176		Ins		NM_025212	IETKESENSIWEQDKKQGSC
1A5	CIMpep194	CCDS10383.1	Ins	ADAMTS17	NM_139057	PWAWRHTLPGCQCRTCGGSC	CCCCCCCCC
	CIMpep295		Ins			LREPALPQGSAQLPGPAGSC
	CIMpep372	CCDS6948.1	Del	TTF1		ASRVHTLKDHRWAVRLGGSC	AAAAAAAA
	CIMpep271		Del		NM_007344	KRKSPITRNLRQWPCLRGSC
	CIMpep474		Del			LWKAVQLLKGSRNPTVQGSC
	CIMpep36	CCDS46450.1	Del	DYNC1I2		KRNRPEEGSCCSCARRIGSC	AAAAAAAAA
	CIMpep155		Del			QILKKKGEKLKHCFKAWGSC
	CIMpep127	CCDS46450.1	Ins	DYNC1I2	NM_001378	KKKQTRRRKLLLLCKKNGSC	AAAAAAAAA
	CIMpep395	CCDS7472.1	Del	SFRP5		TCRSATRWATSACGCPTGSC	GGGGGGGGG
	CIMpep156		Del		NM_003015	AGALRGVRLLWLAGRAAGSC
	CIMpep294		Del			CTAAPTPSRRSALTSLPGSC
	CIMpep74	CCDS3630.1	Ins	HERC5	NM_016323	NNSDHMWRLPFSCTLKRGSC	AAAAAAAAA
	CIMpep84	CCDS44719.1	Del	CASP5		KKQLRCWNTWAKMFFMVGSC	AAAAAAAAAA
	CIMpep81	CCDS43758.1	Ins	RGS22	NM_015668	KIGSPRRRKIWKGWNQTGSC	AAAAAAAAA
	MS-28	Caspase-5-1		Caspase-5		HKKKQLRCWNTWAKMFFGSC
	MS-92	RHOQ_8a_in(1-13)		RHOQ		TVKKNRIKMYKLLFNYVGSC
	CIMpep134	CCDS1690.1	Ins	SMC6	NM_024624	NILVKRESKGLSKSRKFGSC	AAAAAAAAA
	CIMpep162		Ins			RTVSASHRKGQRRTWQNGSC
1B1	CIMpep134	CCDS1690.1	Ins	SMC6	NM_024624	NILVKRESKGLSKSRKFGSC	AAAAAAAAA
	CIMpep162		Ins			RTVSASHRKGQRRTWQNGSC
	CIMpep194	CCDS10383.1	Ins	ADAMTS17	NM_139057	PWAWRHTLPGCQCRTCGGSC	CCCCCCCCC
	CIMpep295		Ins		NM_139057	LREPALPQGSAQLPGPAGSC
	CIMpep396		Ins			VPGTRPAEPQEERPADSGSC
	CIMpep372	CCDS6948.1	Del	TTF1		ASRVHTLKDHRWAVRLGGSC	AAAAAAAA
	CIMpep271		Del		NM_007344	KRKSPITRNLRQWPCLRGSC
	CIMpep474		Del			LWKAVQLLKGSRNPTVQGSC
	CIMpep395	CCDS7472.1	Del	SFRP5		TCRSATRWATSACGCPTGSC	GGGGGGGGG
	CIMpep156		Del		NM_003015	AGALRGVRLLWLAGRAAGSC
	CIMpep294		Del			CTAAPTPSRRSALTSLPGSC
	CIMpep74	CCDS3630.1	Ins	HERC5	NM_016323	NNSDHMWRLPFSCTLKRGSC	AAAAAAAAA
	CIMpep84	CCDS44719.1	Del	CASP5		KKQLRCWNTWAKMFFMVGSC	AAAAAAAAAA
	MS-28	Caspase-5-1		Caspase-5		HKKKQLRCWNTWAKMFFGSC
	CIMpep239	CCDS42721.1	Del	EIF5B	NM_015904	KRKDRRAKNRVLMIMIAGSC	AAAAAAAA
	CIMpep340		Del		NM_015164	KNWKIKIQNQKRLQNRKGSC
	CIMpep441		Del		NM_152546	KKLKGKLKNQIRSGMGQGSC
	CIMpep147	CCDS8723.1	Ins	FAM60A	NM_021238	KLESCGRCKGWTQSKDYGSC	AAAAAAAAA
	CIMpep176		Ins			IETKESENSIWEQDKKQGSC
	GF-91	ELAC1_Exon2_SMAD4_Exon2-3				FSLFPKDQNCFRNWRHIGSC
1B2	CIMpep194	CCDS10383.1	Ins	ADAMTS17	NM_139057	PWAWRHTLPGCQCRTCGGSC	CCCCCCCCC
	CIMpep295		Ins			LREPALPQGSAQLPGPAGSC
	CIMpep396		Ins			VPGTRPAEPQEERPADSGSC
	CIMpep48	CCDS10926.1	Ins	ADAMTS18	0	FCNVRQSERWNSLLPKQGSC	TTTTTTTTT
	CIMpep134	CCDS1690.1	Ins	SMC6	NM_024624	NILVKRESKGLSKSRKFGSC	AAAAAAAAA
	CIMpep162		Ins		NM_017599	RTVSASHRKGQRRTWQNGSC
	CIMpep25	CCDS3091.1	Ins	SLC35G2	NM_004559	KKGELSLEPWIPYLHQQGSC	AAAAAAAAA
	CIMpep24	CCDS3091.1	Del	SLC35G2	NM_025246	LWNHGYPTSTNRRPNDQGSC	AAAAAAAAA
	CIMpep74	CCDS3630.1	Ins	HERC5	NM_016323	NNSDHMWRLPFSCTLKRGSC	AAAAAAAAA
	CIMpep79	CCDS43071.1	Del	ULK4	XM_929989	KRTLESAGLFPWLHTQCGSC	AAAAAAAAAA
	CIMpep36	CCDS46450.1	Del	DYNC1I2	NM_001378	KRNRPEEGSCCSCARRIGSC	AAAAAAAAA
	CIMpep155		Del		NM_022735	QILKKKGEKLKHCFKAWGSC
	CIMpep127	CCDS46450.1	Ins	DYNC1I2	NM_001378	KKKQTRRRKLLLLCKKNGSC	AAAAAAAAA
	CIMpep372	CCDS6948.1	Del	TTF1		ASRVHTLKDHRWAVRLGGSC	AAAAAAAA
	CIMpep271		Del		NM_007344	KRKSPITRNLRQWPCLRGSC
	CIMpep474		Del			LWKAVQLLKGSRNPTVQGSC
	CIMpep395	CCDS7472.1	Del	SFRP5		TCRSATRWATSACGCPTGSC	GGGGGGGGG
	CIMpep156		Del		NM_003015	AGALRGVRLLWLAGRAAGSC
	CIMpep294		Del			CTAAPTPSRRSALTSLPGSC
	CIMpep128	CCDS7472.1	Ins	SFRP5	NM_003015	GRADGRAGAAAGGAALGGSC	GGGGGGGGG
	CIMpep193				NM_183001	RRRAARSTTTMAGRPSRGSC
	MS-28	Caspase-5-1		Caspase-5		HKKKQLRCWNTWAKMFFGSC
1B3	CIMpep395	CCDS7472.1	Del	SFRP5		TCRSATRWATSACGCPTGSC	GGGGGGGGG
	CIMpep156	CCDS7472.1	Del	SFRP5	NM_003015	AGALRGVRLLWLAGRAAGSC
	CIMpep294	CCDS7472.1	Del	SFRP5		CTAAPTPSRRSALTSLPGSC
	CIMpep128	CCDS7472.1	Ins	SFRP5	NM_003015	GRADGRAGAAAGGAALGGSC	GGGGGGGGG
	CIMpep193	CCDS7472.1	Del	SFRP5	NM_183001	RRRAARSTTTMAGRPSRGSC
	MS-28	Caspase-5-1		Caspase-5		HKKKQLRCWNTWAKMFFGSC
	AS-96			6--21		MCQMYQPWMCKKYYRLLGSC
	CIMpep194	CCDS10383.1	Ins	ADAMTS17	NM_139057	PWAWRHTLPGCQCRTCGGSC	CCCCCCCCC
	CIMpep295					LREPALPQGSAQLPGPAGSC
	CIMpep396					VPGTRPAEPQEERPADSGSC
	CIMpep48	CCDS10926.1	Ins	ADAMTS18	0	FCNVRQSERWNSLLPKQGSC	TTTTTTTTT
	CIMpep18	CCDS11974.1	Ins	LMAN1	NM_005570	KRGIPEGPPRPPRAACGGSC	AAAAAAAAA
	CIMpep17	CCDS11974.1	Del	LMAN1	NM_005570	KKRNSRRATPTSKGSLRGSC	AAAAAAAAA
	CIMpep25	CCDS3091.1	Ins	SLC35G2	NM_004559	KKGELSLEPWIPYLHQQGSC	AAAAAAAAA
	CIMpep24	CCDS3091.1	Del	SLC35G2	NM_025246	LWNHGYPTSTNRRPNDQGSC	AAAAAAAAA
	CIMpep74	CCDS3630.1	Ins	HERC5	NM_016323	NNSDHMWRLPFSCTLKRGSC	AAAAAAAAA
	CIMpep36	CCDS46450.1	Del	DYNC1I2	NM_001378	KRNRPEEGSCCSCARRIGSC	AAAAAAAAA
	CIMpep155		Del		NM_022735	QILKKKGEKLKHCFKAWGSC
	CIMpep127	CCDS46450.1	Ins	DYNC1I2	NM_001378	KKKQTRRRKLLLLCKKNGSC	AAAAAAAAA
1B4	CIMpep194	CCDS10383.1	Ins	ADAMTS17	NM_139057	PWAWRHTLPGCQCRTCGGSC	CCCCCCCCC
	CIMpep295	CCDS10383.1	Ins	ADAMTS17		LREPALPQGSAQLPGPAGSC
	CIMpep396	CCDS10383.1	Ins	ADAMTS17		VPGTRPAEPQEERPADSGSC
	CIMpep134	CCDS1690.1	Ins	SMC6	NM_024624	NILVKRESKGLSKSRKFGSC	AAAAAAAAA
	CIMpep162	CCDS1690.1	Ins	SMC6	NM_017599	RTVSASHRKGQRRTWQNGSC
	CIMpep25	CCDS3091.1	Ins	SLC35G2	NM_004559	KKGELSLEPWIPYLHQQGSC	AAAAAAAAA
	CIMpep24	CCDS3091.1	Del	SLC35G2	NM_025246	LWNHGYPTSTNRRPNDQGSC	AAAAAAAAA
	CIMpep137	CCDS3504.1	Del	AASDH	NM_032687	GDAGCGRPPEPAGGGQAGSC	TTTTTTTTTT
	CIMpep165				NM_003359	LCCPTLSFWQREQPSRTGSC
	CIMpep74	CCDS3630.1	Ins	HERC5	NM_016323	NNSDHMWRLPFSCTLKRGSC	AAAAAAAAA
	CIMpep239	CCDS42721.1	Del	EIF5B	NM_015904	KRKDRRAKNRVLMIMIAGSC	AAAAAAAA
	CIMpep340	CCDS42721.1	Del	EIF5B	NM_015164	KNWKIKIQNQKRLQNRKGSC
	CIMpep441	CCDS42721.1	Del	EIF5B	NM_152546	KKLKGKLKNQIRSGMGQGSC
	CIMpep84	CCDS44719.1	Del	CASP5		KKQLRCWNTWAKMFFMVGSC	AAAAAAAAAA
	CIMpep395	CCDS7472.1	Del	SFRP5	NM_003015	TCRSATRWATSACGCPTGSC	GGGGGGGGG
	CIMpep156	CCDS7472.1	Del	SFRP5	NM_181806	AGALRGVRLLWLAGRAAGSC
	CIMpep294	CCDS7472.1	Del	SFRP5	NM_024624	CTAAPTPSRRSALTSLPGSC
	CIMpep128	CCDS7472.1	Ins	SFRP5	NM_003015	GRADGRAGAAAGGAALGGSC	GGGGGGGGG
	CIMpep193	CCDS7472.1	Del	SFRP5	NM_017582	RRRAARSTTTMAGRPSRGSC
	MS-28	Caspase-5-1		Caspase-5		HKKKQLRCWNTWAKMFFGSC
	GF-69	EIF3G_Exon5_TSEN54_Exon9_15-31				RQHTFLMEVPGCWRSLGGSC
1B5	CIMpep134	CCDS1690.1	Ins	SMC6	NM_024624	NILVKRESKGLSKSRKFGSC	AAAAAAAAA
	CIMpep162	CCDS1690.1	Ins	SMC6	NM_017599	RTVSASHRKGQRRTWQNGSC
	CIMpep25	CCDS3091.1	Ins	SLC35G2	NM_004559	KKGELSLEPWIPYLHQQGSC	AAAAAAAAA
	CIMpep24	CCDS3091.1	Del	SLC35G2	NM_025246	LWNHGYPTSTNRRPNDQGSC	AAAAAAAAA
	CIMpep239	CCDS42721.1	Del	EIF5B	NM_015904	KRKDRRAKNRVLMIMIAGSC	AAAAAAAA
	CIMpep340	CCDS42721.1	Del	EIF5B	NM_015164	KNWKIKIQNQKRLQNRKGSC
	CIMpep441	CCDS42721.1	Del	EIF5B	NM_152546	KKLKGKLKNQIRSGMGQGSC
	CIMpep84	CCDS44719.1	Del	CASP5		KKQLRCWNTWAKMFFMVGSC	AAAAAAAAAA
	CIMpep85	CCDS44720.1	Del	CASP5	NM_004347	KKGVRILKLCSKVSFRVGSC	AAAAAAAAAA
	CIMpep485	CCDS46063.1	Ins	WDR87	NM_031951	KRKSCLCGRHLWHCTMFGSC	AAAAAAAA
	CIMpep489	CCDS46063.1	Ins	WDR87	NM_015080	CGCCSSDIQKTALLGWNGSC
	CIMpep36	CCDS46450.1	Del	DYNC1I2	NM_001378	KRNRPEEGSCCSCARRIGSC	AAAAAAAAA
	CIMpep155		Del			QILKKKGEKLKHCFKAWGSC
	CIMpep127	CCDS46450.1	Ins	DYNC1I2	NM_001378	KKKQTRRRKLLLLCKKNGSC	AAAAAAAAA
	MS-28	Caspase-5-1		Caspase-5		HKKKQLRCWNTWAKMFFGSC
	MS-4	NM_001080539.1_839_11a_de(1-17)		CCDC150		QKKKKSWRLLLHSSNLIGSC
BC-PCV vaccs group
Mouse	Peptides1	CCDS	INDEL	Gene	Access #	peptide sequence	MS type
2A1	CIMpep194	CCDS10383.1	Ins	ADAMTS17	NM_139057	PWAWRHTLPGCQCRTCGGSC	CCCCCCCCC
	CIMpep295				NM_139057	LREPALPQGSAQLPGPAGSC
	CIMpep396				NM_139057	VPGTRPAEPQEERPADSGSC
	CIMpep74	CCDS3630.1	Ins	HERC5	NM_016323	NNSDHMWRLPFSCTLKRGSC	AAAAAAAAA
	CIMpep241	CCDS43277.1	Del	RAPGEF2	NM_014247	KFFLCLKKEVWNVTRNRGSC	AAAAAAAA
	CIMpep342				NM_014247	LKIQYQMHLRSFLLLLLGSC
	CIMpep443				NM_014247	LHRVLQGKAILWLPVVLGSC
	CIMpep154	CCDS43478.1	Del	SMAP1	NM_001044305	LQLKSCRRKISNWSLKKGSC	AAAAAAAAAA
	CIMpep35				NM_001044305	KGREKERKGARKAGKTTGSC
	CIMpep81	CCDS43758.1	Ins	RGS22	NM_015668	KIGSPRRRKIWKGWNQTGSC	AAAAAAAAA
	CIMpep143	CCDS55048.1	Ins	AK9	NM_001145128	KRRRRSKKSHRRGIETRGSC	AAAAAAAAA
	CIMpep172				NM_001145128	RRKSKATGTYESEGKRSGSC
	CIMpep372	CCDS6948.1	Del	TTF1	NM_007344	ASRVHTLKDHRWAVRLGGSC	AAAAAAAA
	CIMpep271				NM_007344	KRKSPITRNLRQWPCLRGSC
	CIMpep474				NM_007344	LWKAVQLLKGSRNPTVQGSC
	CIMpep395	CCDS7472.1	Del	SFRP5	NM_003015	TCRSATRWATSACGCPTGSC	GGGGGGGGG
	CIMpep156				NM_003015	AGALRGVRLLWLAGRAAGSC
	CIMpep294				NM_003015	CTAAPTPSRRSALTSLPGSC
	CIMpep147	CCDS8723.1	Ins	FAM60A	NM_021238	KLESCGRCKGWTQSKDYGSC	AAAAAAAAA
	CIMpep176				NM_021238	IETKESENSIWEQDKKQGSC
	CIMpep113	CCDS9300.2	Ins	SACS	NM_014363	LFQSIEHTCLKCFKRGCGSC	AAAAAAAAA
2A2	CIMpep48	CCDS10926.1	Ins	ADAMTS18	0	FCNVRQSERWNSLLPKQGSC	TTTTTTTTT
	CIMpep25	CCDS3091.1	Ins	SLC35G2	NM_025246	KKGELSLEPWIPYLHQQGSC	AAAAAAAAA
	CIMpep74	CCDS3630.1	Ins	HERC5	NM_016323	NNSDHMWRLPFSCTLKRGSC	AAAAAAAAA
	CIMpep84	CCDS44719.1	Del	CASP5	NM_004347	KKQLRCWNTWAKMFFMVGSC	AAAAAAAAAA
	CIMpep85	CCDS44720.1	Del	CASP5	NM_004347	KKGVRILKLCSKVSFRVGSC	AAAAAAAAAA
	CIMpep36	CCDS46450.1	Del	DYNC1I2	NM_001378	KRNRPEEGSCCSCARRIGSC	AAAAAAAAA
	CIMpep155				NM_001378	QILKKKGEKLKHCFKAWGSC
	CIMpep395	CCDS7472.1	Del	SFRP5	NM_003015	TCRSATRWATSACGCPTGSC	GGGGGGGGG
	CIMpep156				NM_003015	AGALRGVRLLWLAGRAAGSC
	CIMpep294				NM_003015	CTAAPTPSRRSALTSLPGSC
	MS-28	Caspase-5-1		Caspase-5		HKKKQLRCWNTWAKMFFGSC
	AS-71			AURKB-2		HKKKQLRCWNTWAKMFFGSC
	MS-19	NM_014956.4_337_11a_de-2		CEP164		TRRTETPPKVRWPWVPHGSC
2A3	CIMpep194	CCDS10383.1	Ins	ADAMTS17	NM_139057	PWAWRHTLPGCQCRTCGGSC	CCCCCCCCC
	CIMpep295				NM_139057	LREPALPQGSAQLPGPAGSC
	CIMpep396				NM_139057	VPGTRPAEPQEERPADSGSC
	CIMpep48	CCDS10926.1	Ins	ADAMTS18	0	FCNVRQSERWNSLLPKQGSC	TTTTTTTTT
	CIMpep134	CCDS1690.1	Ins	SMC6	NM_024624	NILVKRESKGLSKSRKFGSC	AAAAAAAAA
	CIMpep162				NM_024624	RTVSASHRKGQRRTWQNGSC
	CIMpep74	CCDS3630.1	Ins	HERC5	NM_016323	NNSDHMWRLPFSCTLKRGSC	AAAAAAAAA
	CIMpep239	CCDS42721.1	Del	EIF5B	NM_015904	KRKDRRAKNRVLMIMIAGSC	AAAAAAAA
	CIMpep340				NM_015904	KNWKIKIQNQKRLQNRKGSC
	CIMpep441				NM_015904	KKLKGKLKNQIRSGMGQGSC
	CIMpep84	CCDS44719.1	Del	CASP5	NM_004347	KKQLRCWNTWAKMFFMVGSC	AAAAAAAAAA
	CIMpep85	CCDS44720.1	Del	CASP5	NM_004347	KKGVRILKLCSKVSFRVGSC	AAAAAAAAAA
	CIMpep372	CCDS6948.1	Del	TTF1	NM_007344	ASRVHTLKDHRWAVRLGGSC	AAAAAAAA
	CIMpep271				NM_007344	KRKSPITRNLRQWPCLRGSC
	CIMpep474				NM_007344	LWKAVQLLKGSRNPTVQGSC
	CIMpep395	CCDS7472.1	Del	SFRP5	NM_003015	TCRSATRWATSACGCPTGSC	GGGGGGGGG
	CIMpep156				NM_003015	AGALRGVRLLWLAGRAAGSC
	CIMpep294				NM_003015	CTAAPTPSRRSALTSLPGSC
	MS-28	Caspase-5-1		Caspase-5		CTAAPTPSRRSALTSLPGSC
2A4	CIMpep194	CCDS10383.1	Ins	ADAMTS17	NM_139057	PWAWRHTLPGCQCRTCGGSC	CCCCCCCCC
	CIMpep295				NM_139057	LREPALPQGSAQLPGPAGSC
	CIMpep396				NM_139057	VPGTRPAEPQEERPADSGSC
	CIMpep48	CCDS10926.1	Ins	ADAMTS18	0	FCNVRQSERWNSLLPKQGSC	TTTTTTTTT
	CIMpep134	CCDS1690.1	Ins	SMC6	NM_024624	NILVKRESKGLSKSRKFGSC	AAAAAAAAA
	CIMpep162				NM_024624	RTVSASHRKGQRRTWQNGSC
	CIMpep25	CCDS3091.1	Ins	SLC35G2	NM_025246	KKGELSLEPWIPYLHQQGSC	AAAAAAAAA
	CIMpep74	CCDS3630.1	Ins	HERC5	NM_016323	NNSDHMWRLPFSCTLKRGSC	AAAAAAAAA
	CIMpep239	CCDS42721.1	Del	EIF5B	NM_015904	KRKDRRAKNRVLMIMIAGSC	AAAAAAAA
	CIMpep340				NM_015904	KNWKIKIQNQKRLQNRKGSC
	CIMpep441				NM_015904	KKLKGKLKNQIRSGMGQGSC
	CIMpep34	CCDS4344.1	Del	RNF145	NM_144726	KKRKKKTTWLQRRNWRQGSC	AAAAAAAAAAA
	CIMpep81	CCDS43758.1	Ins	RGS22	NM_015668	KIGSPRRRKIWKGWNQTGSC	AAAAAAAAA
	CIMpep395	CCDS7472.1	Del	SFRP5	NM_003015	TCRSATRWATSACGCPTGSC	GGGGGGGGG
	CIMpep156				NM_003015	AGALRGVRLLWLAGRAAGSC
	CIMpep294				NM_003015	CTAAPTPSRRSALTSLPGSC
	MS-28	Caspase-5-1		Caspase-5		HKKKQLRCWNTWAKMFFGSC
2A5	CIMpep194	CCDS10383.1	Ins	ADAMTS17		AMGVAGIMTVDLEGMDMGSC	CCCCCCCCC
	CIMpep295				#N/A	SQHECRSPTGHCLPESPGSC
	CIMpep396				#N/A	PWTPWPLTVPQPTNSSLGSC
	CIMpep25	CCDS3091.1	Ins	SLC35G2	NM_004559	RRPRPQRRRHQARHYGQGSC	AAAAAAAAA
	CIMpep74	CCDS3630.1	Ins	HERC5		LPSRPADNYDNFVLPELGSC	AAAAAAAAA
	CIMpep154	CCDS43478.1	Del	SMAP1	NM_020713	WSGPQAGVSAARRPRWRGSC	AAAAAAAAAA
	CIMpep35				NM_007027	GRLFYMWISLEKQASNAGSC
	CIMpep81	CCDS43478.1	Ins	RGS22	NM_198947	KKHYNRKISIKKLNRMKGSC	AAAAAAAAA
	CIMpep372	CCDS6948.1	Del	TTF1		GAECGHRREGATLAGHRGSC	AAAAAAAA
	CIMpep271				NM_021794	AIPGVFATTEKTATACMGSC
	CIMpep474				NM_015062	QFHMYLWALGMGPRASTGSC
	CIMpep395	CCDS7472.1	Del	SFRP5	NM_006662	GLIPRLPTGLYCFPSSDGSC	GGGGGGGGG
	CIMpep156				NM_024624	RTVSASHRKGQRRTWQNGSC
	CIMpep294				NM_017582	GRARTASPPTGVGAWGSGSC
	CIMpep147	CCDS8723.1	Ins	FAM60A		PMGVVAATLEVVGTRAMGSC	AAAAAAAAA
	CIMpep176				NM_025212	GWRRRRRRRRRGRGWWGGSC
	MS-28	Caspase-5-1		Caspase-5		HKKKQLRCWNTWAKMFFGSC
	AS-26			SEMA3B_14-30		GLPRRCHPVCAEPPPHVGSC
2B1	CIMpep194	CCDS10383.1	Ins	ADAMTS17	NM_139057	PWAWRHTLPGCQCRTCGGSC	CCCCCCCCC
	CIMpep295				NM_139057	LREPALPQGSAQLPGPAGSC
	CIMpep396				NM_139057	VPGTRPAEPQEERPADSGSC
	CIMpep134	CCDS1690.1	Ins	SMC6	NM_024624	NILVKRESKGLSKSRKFGSC	AAAAAAAAA
	CIMpep162				NM_024624	RTVSASHRKGQRRTWQNGSC
	CIMpep74	CCDS3630.1	Ins	HERC5	NM_016323	NNSDHMWRLPFSCTLKRGSC	AAAAAAAAA
	CIMpep79	CCDS43071.1	Del	ULK4	XM_929989	KRTLESAGLFPWLHTQCGSC	AAAAAAAAAA
	CIMpep36	CCDS46450.1	Del	DYNC1I2	NM_001378	KRNRPEEGSCCSCARRIGSC	AAAAAAAAA
	CIMpep155				NM_001378	QILKKKGEKLKHCFKAWGSC
	CIMpep127	CCDS46450.1	Ins	DYNC1I2	NM_001378	KKKQTRRRKLLLLCKKNGSC	AAAAAAAAA
	CIMpep372	CCDS6948.1	Del	TTF1	NM_007344	ASRVHTLKDHRWAVRLGGSC	AAAAAAAA
	CIMpep271				NM_007344	KRKSPITRNLRQWPCLRGSC
	CIMpep474				NM_007344	LWKAVQLLKGSRNPTVQGSC
	CIMpep395	CCDS7472.1	Del	SFRP5	NM_003015	TCRSATRWATSACGCPTGSC	GGGGGGGGG
	CIMpep156				NM_003015	AGALRGVRLLWLAGRAAGSC
	CIMpep294				NM_003015	CTAAPTPSRRSALTSLPGSC
	CIMpep147	CCDS8723.1	Ins	FAM60A	NM_021238	KLESCGRCKGWTQSKDYGSC	AAAAAAAAA
	CIMpep176				NM_025212	IETKESENSIWEQDKKQGSC
	MS-28	Caspase-5-1		Caspase-5		HKKKQLRCWNTWAKMFFGSC
	AS-96			6--21	#N/A	MCQMYQPWMCKKYYRLLGSC
2B2	CIMpep134	CCDS1690.1	Ins	SMC6	NM_024624	NILVKRESKGLSKSRKFGSC	AAAAAAAAA
	CIMpep162				NM_024624	RTVSASHRKGQRRTWQNGSC
	CIMpep137	CCDS3504.1	Del	AASDH	NM_181806	FWDEKTVRSNVMANVLTGSC	TTTTTTTTTT
	CIMpep165				NM_181806	SFSKWSLVQLHGIIRKNGSC
	CIMpep74	CCDS3630.1	Ins	HERC5	NM_016323	NNSDHMWRLPFSCTLKRGSC	AAAAAAAAA
	CIMpep79	CCDS43071.1	Del	ULK4	XM_929989	KRTLESAGLFPWLHTQCGSC	AAAAAAAAAA
	CIMpep84	CCDS44719.1	Del	CASP5	NM_004347	KKQLRCWNTWAKMFFMVGSC	AAAAAAAAAA
	CIMpep485	CCDS46063.1	Ins	WDR87	NM_031951	KRKSCLCGRHLWHCTMFGSC	AAAAAAAA
	CIMpep489				NM_031951	CGCCSSDIQKTALLGWNGSC
	CIMpep269	CCDS55691.1	Ins	RYR2	NM_001035	FCRSPSRHCYGIQDIKNGSC	TTTTTTTTT
	CIMpep370				NM_001035	HLVLSNSQWQTARINRWGSC
	CIMpep471				NM_001035	LISCCCIPIHCGGIQFFGSC
	CIMpep372	CCDS6948.1	Del	TTF1	NM_007344	ASRVHTLKDHRWAVRLGGSC	AAAAAAAA
	CIMpep271				NM_007344	KRKSPITRNLRQWPCLRGSC
	CIMpep474				NM_007344	LWKAVQLLKGSRNPTVQGSC
	CIMpep395	CCDS7472.1	Del	SFRP5	NM_003015	TCRSATRWATSACGCPTGSC	GGGGGGGGG
	CIMpep156				NM_003015	AGALRGVRLLWLAGRAAGSC
	CIMpep294				NM_003015	CTAAPTPSRRSALTSLPGSC
	MS-28	Caspase-5-1		Caspase-5		HKKKQLRCWNTWAKMFFGSC
2B3	CIMpep194	CCDS10383.1	Ins	ADAMTS17	NM_139057	PWAWRHTLPGCQCRTCGGSC	CCCCCCCCC
	CIMpep295				NM_139057	LREPALPQGSAQLPGPAGSC
	CIMpep396				NM_139057	VPGTRPAEPQEERPADSGSC
	CIMpep48	CCDS10926.1	Ins	ADAMTS18	0	FCNVRQSERWNSLLPKQGSC	TTTTTTTTT
	CIMpep134	CCDS1690.1	Ins	SMC6	NM_024624	NILVKRESKGLSKSRKFGSC	AAAAAAAAA
	CIMpep162				NM_024624	RTVSASHRKGQRRTWQNGSC
	CIMpep74	CCDS3630.1	Ins	HERC5	NM_016323	NNSDHMWRLPFSCTLKRGSC	AAAAAAAAA
	CIMpep79	CCDS43071.1	Del	ULK4	XM_929989	KRTLESAGLFPWLHTQCGSC	AAAAAAAAAA
	CIMpep84	CCDS44719.1	Del	CASP5	NM_004347	KKQLRCWNTWAKMFFMVGSC	AAAAAAAAAA
	CIMpep36	CCDS46450.1	Del	DYNC1I2	NM_001378	KRNRPEEGSCCSCARRIGSC	AAAAAAAAA
	CIMpep155				NM_001378	QILKKKGEKLKHCFKAWGSC
	CIMpep372	CCDS6948.1	Del	TTF1	NM_007344	ASRVHTLKDHRWAVRLGGSC	AAAAAAAA
	CIMpep271				NM_007344	KRKSPITRNLRQWPCLRGSC
	CIMpep474				NM_007344	LWKAVQLLKGSRNPTVQGSC
	CIMpep395	CCDS7472.1	Del	SFRP5	NM_003015	TCRSATRWATSACGCPTGSC	GGGGGGGGG
	CIMpep156				NM_003015	AGALRGVRLLWLAGRAAGSC
	CIMpep294				NM_003015	CTAAPTPSRRSALTSLPGSC
	MS-28	Caspase-5-1		Caspase-5		HKKKQLRCWNTWAKMFFGSC
2B4	CIMpep48	CCDS10926.1	Ins	ADAMTS18	0	FCNVRQSERWNSLLPKQGSC	TTTTTTTTT
	CIMpep134	CCDS1690.1	Ins	SMC6	NM_024624	NILVKRESKGLSKSRKFGSC	AAAAAAAAA
	CIMpep162				NM_024624	RTVSASHRKGQRRTWQNGSC
	CIMpep343	CCDS43354.1	Del	SRFBP1	NM_152546	NFVKRRRNILMIAQKKGGSC	AAAAAAAA
	CIMpep444				NM_152546	SLGKSDGHERRKVVVILGSC
	CIMpep187	CCDS43373.1	Ins	DIAPH1	NM_005219	PTSSLAWRSRNATSSSPGSC	CCCCCCCC
	CIMpep288				NM_005219	SSWWSWNPSTSSISRRPGSC
	CIMpep389				NM_005219	WHSSTSTRNGYASTSPIGSC
	CIMpep85	CCDS44720.1	Del	CASP5	NM_004347	KKGVRILKLCSKVSFRVGSC	AAAAAAAAAA
	CIMpep87	CCDS45025.1	Del	RFC3	NM_002915	KKLKLAPLQVTTTLKLIGSC	AAAAAAAAAA
	CIMpep485	CCDS46063.1	Ins	WDR87	NM_031951	KRKSCLCGRHLWHCTMFGSC	AAAAAAAA
	CIMpep489				NM_031951	CGCCSSDIQKTALLGWNGSC
	CIMpep391	CCDS46136.1	Ins	LMTK3	NM_052895	GHPPGPPTPGPQAPWRIGSC	GGGGGGG
	CIMpep392				NM_052895	ATRPGPRRPARRPRGELGSC
	CIMpep92	CCDS53577.1	Del	TCF7L2	NM_030756	YKVKAAASAHPLQMEAYGSC	AAAAAAAAA
	CIMpep267	CCDS55244.1	Del	STAU2	NM_001164380	KMLQKQCCYNLVIKHPLGSC	AAAAAAAA
	CIMpep368				NM_001164380	IFRINLRRQGKTKDGVVGSC
	CIMpep469				NM_001164380	FICLLMFIKRWKPAATKGSC
2B5	CIMpep194	CCDS10383.1	Ins	ADAMTS17	NM_139057	PWAWRHTLPGCQCRTCGGSC	CCCCCCCCC
	CIMpep295				NM_139057	LREPALPQGSAQLPGPAGSC
	CIMpep396				NM_139057	VPGTRPAEPQEERPADSGSC
	CIMpep25	CCDS3091.1	Ins	SLC35G2	NM_025246	KKGELSLEPWIPYLHQQGSC	AAAAAAAAA
	CIMpep74	CCDS3630.1	Ins	HERC5	NM_016323	NNSDHMWRLPFSCTLKRGSC	AAAAAAAAA
	CIMpep154	CCDS43478.1	Del	SMAP1	NM_001044305	LQLKSCRRKISNWSLKKGSC	AAAAAAAAAA
	CIMpep35				NM_001044305	KGREKERKGARKAGKTTGSC
	CIMpep81	CCDS43758.1	Ins	RGS22	NM_015668	KIGSPRRRKIWKGWNQTGSC	AAAAAAAAA
	CIMpep372	CCDS6948.1	Del	TTF1	NM_007344	ASRVHTLKDHRWAVRLGGSC	AAAAAAAA
	CIMpep271				NM_007344	KRKSPITRNLRQWPCLRGSC
	CIMpep474				NM_007344	LWKAVQLLKGSRNPTVQGSC
	CIMpep395	CCDS7472.1	Del	SFRP5	NM_003015	TCRSATRWATSACGCPTGSC	GGGGGGGGG
	CIMpep156				NM_003015	AGALRGVRLLWLAGRAAGSC
	CIMpep294				NM_003015	CTAAPTPSRRSALTSLPGSC
	CIMpep147	CCDS8723.1	Ins	FAM60A	NM_021238	KLESCGRCKGWTQSKDYGSC	AAAAAAAAA
	CIMpep176				NM_021238	IETKESENSIWEQDKKQGSC
	MS-28	Caspase-5-1		Caspase-5		HKKKQLRCWNTWAKMFFGSC
	AS-26			SEMA3B_14-30		GLPRRCHPVCAEPPPHVGSC
NR-PCV/ICI vaccs group
3A1	CIMpep130	CCDS11614.1	Ins	PRR11	NM_018304	KRSLSLSVQANYTSSSTGSC	AAAAAAAAA
	CIMpep158				NM_018304	TLTRKSRYFFNRYISKQGSC
	CIMpep206	CCDS11861.1	Del	CEP76	NM_024899	KLILIQHGGIFTFRFWVGSC	AAAAAAAA
	CIMpep307				NM_024899	EKLSWNICKNLSLYLDKGSC
	CIMpep408				NM_024899	FVQRLLYVYIIETNVFVGSC
	CIMpep211	CCDS13201.1	Del	ASXL1	NM_015338	GVARVEVAAGPPMREVAGSC	GGGGGGGG
	CIMpep312				NM_015338	EAAAVVMVVRPVATLSPGSC
	CIMpep413				NM_015338	GEARAPLESVRQIYSEHGSC
	CIMpep219	CCDS2557.1	Del	CNTN6	NM_014461	KSLLFKLVGILLSDANQGSC	AAAAAAAA
	CIMpep320				NM_014461	MLFPGQLSLGKEERRPLGSC
	CIMpep421				NM_014461	DKAKEYFSWRMAASRYIGSC
	CIMpep180	CCDS33051.1	Del	VASP	0	PTPRFAPFGGPSCSARSGSC	CCCCCCCC
	CIMpep281				0	RGRTTPCTPSPGSTGPWGSC
	CIMpep383				0	NSGKSASRRRPQGGPQPGSC
	CIMpep228	CCDS34171.1	Del	SREK1IP1	NM_173829	KKGKGLTHPVPLKRTLQGSC	AAAAAAAAAA
	CIMpep329				NM_173829	NKRNKNIRRKKRKKKKRGSC
	CIMpep430				NM_173829	VNQKKGNITKRKKRREKGSC
	CIMpep231	CCDS34607.2	Ins	TMEM196	NM_152774	KIRTCHDPLFSLLYLWTGSC	AAAAAAAAA
	CIMpep332				NM_152774	YWGHPEFSVPPGSHKENGSC
	CIMpep433				NM_152774	FLPIPTAPCLHVSRVHWGSC
	CIMpep238	CCDS41693.1	Ins	USP35	XM_290527	QSGGKDREGGRREGGENGSC	CCCCCCCC
	CIMpep339				XM_290527	GEGRSGGGGGKHQRGRRGSC
	CIMpep440				XM_290527	EGERGGGGRGRREGGEGGSC
	CIMpep186	CCDS43373.1	Del	DIAPH1	NM_005219	PHLLPCLEKQECHLLLPGSC	CCCCCCCC
	CIMpep287				NM_005219	LFLVVLESLHLLHFPEAGSC
	CIMpep388				NM_005219	LAFLHLHPEWVCLHLPHGSC
	AS-97			1--78	#N/A	QPQASANPCQLLKPMVAGSC
3A2	CIMpep129	CCDS1113.2	Del	ASH1L	NM_018489	KQRKVVKNPSQPVPLRNGSC	AAAAAAAAA
	CIMpep157				NM_018489	DGITNGNDSTRSCSISLGSC
	CIMpep15	CCDS11672.1	Del	#N/A	#N/A	KKRRNRKKKKRCSKRHGGSC	AAAAAAAAA
	CIMpep133	CCDS1551.1	Del	ACBD3	NM_022735	KGRRKRSEGGVKRKKENGSC	AAAAAAAAA
	CIMpep161				NM_022735	GEKKRKGFDGRKRKGDGGSC
	CIMpep228	CCDS34171.1	Del	SREK1IP1	NM_173829	KKGKGLTHPVPLKRTLQGSC	AAAAAAAAAA
	CIMpep329				NM_173829	NKRNKNIRRKKRKKKKRGSC
	CIMpep430				NM_173829	VNQKKGNITKRKKRREKGSC
	CIMpep123	CCDS41878.1	Del	PDS5B	NM_015032	KIWTSSTRGGGRRRKTKGSC	AAAAAAAAA
	CIMpep184				NM_015032	KNLDLQHQRRRKKKKDKGSC
	CIMpep386				NM_015032	SPHHRKDEEDHQKRHHHGSC
	CIMpep125	CCDS4344.1	Ins	RNF145	NM_144726	KKEKKKQHGCKGETGGSGSC	AAAAAAAAAAA
	CIMpep153				NM_144726	VKCGPEGAKHHAVGCPVGSC
	CIMpep259	CCDS47535.1	Del	USP42	XM_166526	KRRRKRRDIQENQRTLLGSC	AAAAAAAA
	CIMpep360				XM_166526	KIQNCTYPGSPAWRLSPGSC
	CIMpep461				XM_166526	KASDLSVRKRNTYGWKAGSC
	CIMpep261	CCDS4907.2	Del	VEGFA	NM_001025366	NQFEERERGKNESARNPGSC	AAAAAAAA
	CIMpep362				NM_001025366	GISPGAFPVGLAQSGESGSC
	CIMpep463				NM_001025366	ICLYKIRRRVNVPAKTQGSC
	CIMpep43	CCDS55858.1	Del	CEP290	NM_025114	KNSSNGSRKRKKKCNFRGSC	AAAAAAAAAA
	AS-97			1--78	#N/A	QPQASANPCQLLKPMVAGSC
3A3	CIMpep46	CCDS10154.1	Del	DYX1C1	NM_130810	KRNYVKKKSKLKKKEKKGSC	AAAAAAAAA
	CIMpep129	CCDS1113.2	Del	ASH1L	NM_018489	KQRKVVKNPSQPVPLRNGSC	AAAAAAAAA
	CIMpep157				NM_018489	DGITNGNDSTRSCSISLGSC AAAAAAAAA
	CIMpep130	CCDS11614.1	Ins	PRR11	NM_018304	KRSLSLSVQANYTSSSTGSC	AAAAAAAAA
	CIMpep158				NM_018304	TLTRKSRYFFNRYISKQGSC
	CIMpep326	CCDS33015.1	Ins	HNRNPL	0	VGAQVATAPSMGTPHPLGSC	CCCCCCCC
	CIMpep493				0	PTSLRREKDGSTSGGSPGSC
	CIMpep497				0	PTTRVWPSRRQPCAHGLGSC
	CIMpep228	CCDS34171.1	Del	SREK1IP1	NM_173829	KKGKGLTHPVPLKRTLQGSC	AAAAAAAAAA
	CIMpep329				NM_173829	NKRNKNIRRKKRKKKKRGSC
	CIMpep430				NM_173829	VNQKKGNITKRKKRREKGSC
	CIMpep70	CCDS34487.1	Ins	MYO6	NM_004999	RKAEAYSRRNGKGKKKTGSC	AAAAAAAAA
	CIMpep99	CCDS58166.1	Del	CEP57	NM_014679	KCKSWKQNSMKKNRKGNGSC	AAAAAAAAA
	CIMpep277	CCDS9239.1	Ins	VPS37B	NM_024667	PTTPGACGTLSHPVYCGGSC	CCCCCCCCC
	CIMpep378				NM_024667	HEFGTGRAVPRITVPAPGSC
	CIMpep481				NM_024667	ETPAPAPSTPAGFHPPVGSC
	AS-1			NUDT8_1-17		DEVFALPLAHLLQTQNQGSC
	AS-97			1--78	#N/A	QPQASANPCQLLKPMVAGSC
3A4	CIMpep12	CCDS10987.1	Del	TCF25	NM_014972	KTEKQEKQHGRSIGKRTGSC	AAAAAAAAA
	CIMpep24	CCDS3091.1	Del	SLC35G2	NM_025246	LWNHGYPTSTNRRPNDQGSC	AAAAAAAAA
	CIMpep149	CCDS32912.1	Del	ELAVL3	NM_001420	EPLTTARPTSSSTTCPRGSC	GGGGGGGGG
	CIMpep26				NM_001420	GPGRPGPAQRATPWYKWGSC
	CIMpep181	CCDS33051.1	Ins	VASP	0	PHPQVCPLRGSQLQRTEGSC	CCCCCCCC
	CIMpep282				0	QGEDHPLHPLSRQHRALGSC
	CIMpep382				0	WWGSWGPRPGRSYCWSQGSC
	CIMpep189	CCDS46136.1	Del	LMTK3	NM_052895	PRGTRTRQRLQRPRHLPGSC	CCCCCCCC
	CIMpep190				NM_052895	RGGHGPVNASSAPDTSPGSC
	CIMpep290				NM_052895	TPPPPEMGFPATTAALEGSC
	CIMpep291	CCDS46136.1	Ins	LMTK3	NM_052895	QFRVGGGFPPPPPSRPPGSC	GGGGGGG
	CIMpep391				NM_052895	GHPPGPPTPGPQAPWRIGSC
	CIMpep145	CCDS6426.1	Ins	CYHR1	NM_032687	GDAGCGRPPEPAGGGQAGSC	GGGGGGGGG
	CIMpep174				NM_032687	QLGLLPGPAYTAPPVGVGSC
	AS-1			NUDT8_1-17		DEVFALPLAHLLQTQNQGSC
	AS-38			KRT8-2		TAAGLRLRACTRSSMRSGSC
	AS-39			KRT8-3		SSMRSCRAWLGSTGMTCGSC
	AS-97			1--78	#N/A	QPQASANPCQLLKPMVAGSC
3A5	CIMpep129	CCDS1113.2	Del	ASH1L	NM_018489	KQRKVVKNPSQPVPLRNGSC	AAAAAAAAA
	CIMpep157				NM_018489	DGITNGNDSTRSCSISLGSC
	CIMpep130	CCDS11614.1	Ins	PRR11	NM_018304	KRSLSLSVQANYTSSSTGSC	AAAAAAAAA
	CIMpep158				NM_018304	TLTRKSRYFFNRYISKQGSC
	CIMpep178	CCDS30852.1	Ins	ADAMTSL4	NM_019032	GWLLGAPGALWTSPPAQGSC	GGGGGGGG
	CIMpep179	CCDS30852.1	Del	ADAMTSL4	NM_019032	GVAPRCPRSAVDISPGPGSC	GGGGGGGG
	CIMpep280				NM_019032	TSPSLASCASVAIGKLAGSC
	CIMpep381				NM_019032	LLGASAPCGAAGAREAGGSC
	CIMpep2	CCDS30881.1	Ins	SHC1	NM_183001	GGRHEASGRSRSRGCSTGSC	GGGGGGGG
	CIMpep5				NM_183001	HCTQCPDPQPLGSYIACGSC
	CIMpep8				NM_183001	RTACWGRSRSPQTDATSGSC
	CIMpep137	CCDS3504.1	Del	AASDH	NM_181806	FWDEKTVRSNVMANVLTGSC	TTTTTTTTTT
	CIMpep165				NM_181806	SFSKWSLVQLHGIIRKNGSC
	CIMpep145	CCDS6426.1	Ins	CYHR1	NM_032687	GDAGCGRPPEPAGGGQAGSC	GGGGGGGGG
	CIMpep174				NM_032687	QLGLLPGPAYTAPPVGVGSC
	AS-1			NUDT8_1-17		DEVFALPLAHLLQTQNQGSC
	AS-17			IST1_14-30		LPSRPADNYDNFVLPELGSC
	AS-25			SEMA3B_1-17		LPQQDLWHLQFHQGLPRGSC
	AS-33			BFAR-1		WSCSSITGAAGNLNTTSGSC
	AS-97			1--78	#N/A	QPQASANPCQLLKPMVAGSC
3B1	CIMpep211	CCDS13201.1	Del	ASXL1	NM_015338	GVARVEVAAGPPMREVAGSC	GGGGGGGG
	CIMpep312				NM_015338	EAAAVVMVVRPVATLSPGSC
	CIMpep413				NM_015338	GEARAPLESVRQIYSEHGSC
	CIMpep179	CCDS30852.1	Del	ADAMTSL4	NM_019032	GVAPRCPRSAVDISPGPGSC	GGGGGGGG
	CIMpep280				NM_019032	TSPSLASCASVAIGKLAGSC
	CIMpep381				NM_019032	LLGASAPCGAAGAREAGGSC
	CIMpep180	CCDS33051.1	Del	VASP	0	PTPRFAPFGGPSCSARSGSC	CCCCCCCC
	CIMpep281				0	RGRTTPCTPSPGSTGPWGSC
	CIMpep383				0	NSGKSASRRRPQGGPQPGSC
	CIMpep1	CCDS3455.1	Del	UGDH	NM_003359	FLPILMMPSKKLILYLFGSC	TTTTTTTTT
	CIMpep123	CCDS41878.1	Del	PDS5B	NM_015032	KIWTSSTRGGGRRRKTKGSC	AAAAAAAAA
	CIMpep184				NM_015032	KNLDLQHQRRRKKKKDKGSC
	CIMpep386				NM_015032	SPHHRKDEEDHQKRHHHGSC
	CIMpep186	CCDS43373.1	Del	DIAPH1	NM_005219	PHLLPCLEKQECHLLLPGSC	CCCCCCCC
	CIMpep287				NM_005219	LFLVVLESLHLLHFPEAGSC
	CIMpep388				NM_005219	LAFLHLHPEWVCLHLPHGSC
	CIMpep187	CCDS43373.1	Ins	DIAPH1	NM_005219	PTSSLAWRSRNATSSSPGSC	CCCCCCCC
	CIMpep288				NM_005219	SSWWSWNPSTSSISRRPGSC
	CIMpep389				NM_005219	WHSSTSTRNGYASTSPIGSC
	CIMpep189	CCDS46136.1	Del	LMTK3	NM_052895	PRGTRTRQRLQRPRHLPGSC	CCCCCCCC
	CIMpep190				NM_052895	RGGHGPVNASSAPDTSPGSC
	CIMpep290				NM_052895	TPPPPEMGFPATTAALEGSC
	AS-18			IST1_25-41		FVLPELPSVPDTLPTASGSC
	AS-97			1--78	#N/A	QPQASANPCQLLKPMVAGSC
3B2	AS-1			NUDT8_1-17		DEVFALPLAHLLQTQNQGSC
	AS-17			IST1_14-30		LPSRPADNYDNFVLPELGSC
	AS-18			IST1_25-41		FVLPELPSVPDTLPTASGSC
	AS-19			IST1_37-53		LPTASAGASTSASEDIDGSC
	AS-25			SEMA3B_1-17		LPQQDLWHLQFHQGLPRGSC
	AS-27			SEMA3B_31-47		QLCPAHWGAPSFPTSWSGSC
	AS-28			SEMA3B_43-59		PTSWSQLHLHSNCRGPGGSC
	AS-33			BFAR-1		WSCSSITGAAGNLNTTSGSC
	AS-37			KRT8-1		LLRSRHSTRILPTAAGLGSC
	AS-38			KRT8-2		TAAGLRLRACTRSSMRSGSC
3B3	CIMpep131	CCDS13289.1	Ins	RBL1	NM_002895	KVICTFYPTDRTEIFTRGSC	AAAAAAAAA
	CIMpep159				NM_002895	KCEPVTEYCGWSEKCTKGSC
	CIMpep100	CCDS58191.1	Ins	CHEK1	NM_001274	NIPQPLEKNRFCSSSSAGSC	AAAAAAAAA
	AS-17			IST1_14-30		LPSRPADNYDNFVLPELGSC
	AS-37			KRT8-1		LLRSRHSTRILPTAAGLGSC
	AS-38			KRT8-2		TAAGLRLRACTRSSMRSGSC
	AS-91			C19orf40-1	#N/A	DAAFFMSPKLIWWQEMAGSC
	AS-92			C19orf40-2	#N/A	KLIWWQEMATERGLFGLGSC
	AS-93			C19orf40-3	#N/A	TERGLFGLEIPIILKELGSC
	AS-94			SMC1A-1	#N/A	NGSGCCGIYCHEEPQREGSC
	AS-97			1--78	#N/A	QPQASANPCQLLKPMVAGSC
3B4	CIMpep246	CCDS44839.1	Del	PIK3C2G	NM_004570	KSEKDIMQLMLISILGRGSC	AAAAAAAA
	CIMpep347				NM_004570	SGALLQHFRISSFLRPSGSC
	CIMpep448				NM_004570	LIYIFLLITQHNLFILCGSC
	CIMpep247	CCDS4488.1	Del	PRPF4B	0	KRSINTEVNIRNINIPQGSC	AAAAAAAA
	CIMpep348				0	KKTRIKNINISINIRNTGSC
	CIMpep449				0	KEKRLLMLLIKRVCLQQGSC
	CIMpep92	CCDS53577.1	Del	TCF7L2	NM_030756	YKVKAAASAHPLQMEAYGSC	AAAAAAAAA
	CIMpep269	CCDS55691.1	Ins	RYR2	NM_001035	FCRSPSRHCYGIQDIKNGSC	TTTTTTTTT
	CIMpep370				NM_001035	HLVLSNSQWQTARINRWGSC
	CIMpep471				NM_001035	LISCCCIPIHCGGIQFFGSC
	CIMpep483	CCDS8077.1	Ins	NRXN2	NM_015080	GPGEEEPAMCTSQQKARGSC	GGGGGGGG
	CIMpep487				NM_015080	RSLWRPSKAMSSSATTCGSC
	CIMpep491				NM_015080	HTTPSRAALMRSHWPSAGSC
	AS-18			IST1_25-41		FVLPELPSVPDTLPTASGSC
	AS-19			IST1_37-53		LPTASAGASTSASEDIDGSC
	AS-71			AURKB-2		VLPWEEGDSQRHKARKSGSC
	AS-80			RDH11-2		ETKGISPIKDSKCVFPRGSC
	MS-70	CDC7_9a_de-4		CDC7		LEKALSALFIWPQHSYKGSC
3B5	CIMpep130	CCDS11614.1	Ins	PRR11	NM_018304	KRSLSLSVQANYTSSSTGSC	AAAAAAAAA
	CIMpep158				NM_018304	TLTRKSRYFFNRYISKQGSC
	CIMpep120	CCDS11681	Ins	ABCA9	NM_172386	KSSFPATDFRPLPFCILGSC	AAAAAAAAA
	CIMpep16				NM_172386	KKLIPSYGFQASTLLHTGSC
	CIMpep149	CCDS32912	Del	ELAVL3	NM_001420	EPLTTARPTSSSTTCPRGSC	GGGGGGGGG
	CIMpep26				NM_001420	GPGRPGPAQRATPWYKWGSC
	CIMpep1	CCDS3455	Del	UGDH	NM_003359	FLPILMMPSKKLILYLFGSC	TTTTTTTTT
	AS-1			NUDT8_1-17		DEVFALPLAHLLQTQNQGSC
	AS-17			IST1_14-30		LPSRPADNYDNFVLPELGSC
	AS-18			IST1_25-41		FVLPELPSVPDTLPTASGSC
	AS-19			IST1_37-53		LPTASAGASTSASEDIDGSC
	AS-33			BFAR-1		WSCSSITGAAGNLNTTSGSC
	AS-97			1--78	#N/A	QPQASANPCQLLKPMVAGSC
NR-PCV vaccs group
E3.1	CIMpep11	CCDS10124.1	Ins	C15orf48	NM_032413	KIQNLGKLWTLLYLKSLGSC	AAAAAAAAA
	CIMpep18	CCDS11974.1	Ins	LMAN1	NM_005570	KRGIPEGPPRPPRAACGGSC	AAAAAAAAA
	CIMpep43	CCDS55858.1	Del	CEP290	NM_025114	KNSSNGSRKRKKKCNFRGSC	AAAAAAAAAA
	AS-19			IST1_37-53		LPTASAGASTSASEDIDGSC
	AS-25			SEMA3B_1-17		LPQQDLWHLQFHQGLPRGSC
	MS-1	SPAG9_9a_in(1-15)		SPAG9		KKVKHLAVFQPTFQLLKGSC
	MS-11	NM_001243076.1_126_11a_de-2		E2F3		RGMIRLLVCSPRSSFSSGSC
	MS-17	XM_003119113.2_919_11a_in-2		LOC100287534		CNEPRACGTQNSEQGGLGSC
	MS-24	SPAG9_9a_de-1		SPAG9		GQAFGSFSADFSAPQVTGSC
	MS-41	MSH3-2nd-1		MSH3		KRATFLLALWECSLPQAGSC
E3.2	AS-1			NUDT8_1-17		DEVFALPLAHLLQTQNQGSC
	AS-17			IST1_14-30		LPSRPADNYDNFVLPELGSC
	AS-18			IST1_25-41		FVLPELPSVPDTLPTASGSC
	AS-19			IST1_37-53		LPTASAGASTSASEDIDGSC
	AS-33			BFAR-1		WSCSSITGAAGNLNTTSGSC
	AS-65			FANCI-2		SKKYGKAGEAVWFSSDPGSC
	AS-80			RDH11-2		ETKGISPIKDSKCVFPRGSC
	AS-81			RDH11-3		DSKCVFPRTSPGKDPLPGSC
	AS-89			SLC13A3-2		WAAAPPGECAPRPGCAAGSC
	AS-96			6--21		MCQMYQPWMCKKYYRLLGSC
E3.3	AS-1			NUDT8_1-17		DEVFALPLAHLLQTQNQGSC
	AS-19			IST1_37-53		LPTASAGASTSASEDIDGSC
	AS-27			SEMA3B_31-47		QLCPAHWGAPSFPTSWSGSC
	AS-38			KRT8-2		TAAGLRLRACTRSSMRSGSC
	AS-65			FANCI-2		SKKYGKAGEAVWFSSDPGSC
	AS-66			FANCI-3		WFSSDPPVLFFHFLRTEGSC
	AS-70			AURKB-1		DHGGVGRCSNVLPWEEGGSC
	AS-71			AURKB-2		VLPWEEGDSQRHKARKSGSC
	AS-80			RDH11-2		ETKGISPIKDSKCVFPRGSC
	AS-81			RDH11-3		DSKCVFPRTSPGKDPLPGSC
E3.4	AS-1			NUDT8_1-17		DEVFALPLAHLLQTQNQGSC
	AS-17			IST1_14-30		LPSRPADNYDNFVLPELGSC
	AS-18			IST1_25-41		FVLPELPSVPDTLPTASGSC
	AS-19			IST1_37-53		LPTASAGASTSASEDIDGSC
	AS-25			SEMA3B_1-17		LPQQDLWHLQFHQGLPRGSC
	AS-26			SEMA3B_14-30		GLPRRCHPVCAEPPPHVGSC
	AS-27			SEMA3B_31-47		QLCPAHWGAPSFPTSWSGSC
	AS-28			SEMA3B_43-59		PTSWSQLHLHSNCRGPGGSC
	AS-33			BFAR-1		WSCSSITGAAGNLNTTSGSC
	AS-37			KRT8-1		LLRSRHSTRILPTAAGLGSC
E3.5	CIMpep130	CCDS11614.1	Ins	PRR11	NM_018304	KRSLSLSVQANYTSSSTGSC	AAAAAAAAA
	CIMpep158				NM_018304	TLTRKSRYFFNRYISKQGSC
	CIMpep59	CCDS3171.1	Del	DHX36	NM_020865	KCLESGTDHILTEILSIGSC	AAAAAAAAA
	CIMpep91	CCDS53545.1	Del	KCNMA1	NM_002247	KSNGMEACGTHPTPRLSGSC	AAAAAAA
	CIMpep43	CCDS55858.1	Del	CEP290	NM_025114	KNSSNGSRKRKKKCNFRGSC	AAAAAAAAAA
	CIMpep276	CCDS907.1	Del	ADAM30	NM_021794	AIPGVFATTEKTATACMGSC	AAAAAAAA
	CIMpep377				NM_021794	GGHLHSVRKWGMEEALTGSC
	CIMpep480				NM_021794	VGLQDCSEGRFPRQFGLGSC
	AS-1			NUDT8_1-17		DEVFALPLAHLLQTQNQGSC
	AS-17			IST1_14-30		LPSRPADNYDNFVLPELGSC
	AS-18			IST1_25-41		FVLPELPSVPDTLPTASGSC
	AS-33			BFAR-1		WSCSSITGAAGNLNTTSGSC
	MS-51	TGFβR II-2		TGFBR2		VPVALMSAMTTSSSQKNGSC
1 Bold peptides are the ones selected as positive for the vaccine, other peptides were included since they are part of the selected Fs antigen; # N/A= not applicable; MS type= microsatellite type;
